# Supplementary material for: Biochemical role of FOXM1-dependent histone linker H1B in human epidermal stem cells
Source: PubMed Central journal article supplement (PMC11255229; doi:10.1038/s41419-024-06905-1), 2024-07-17

Figure 1h

FOXM1

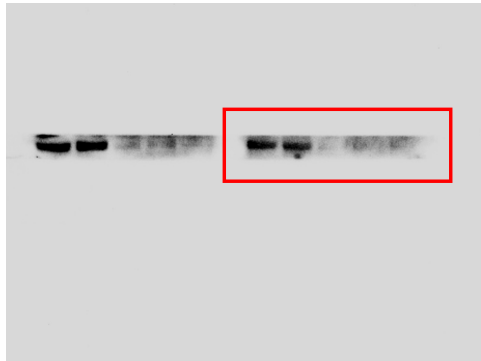

H1B

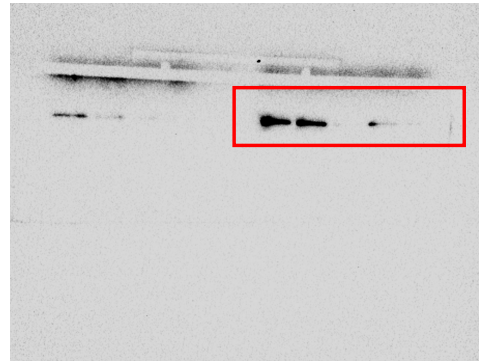

VINC

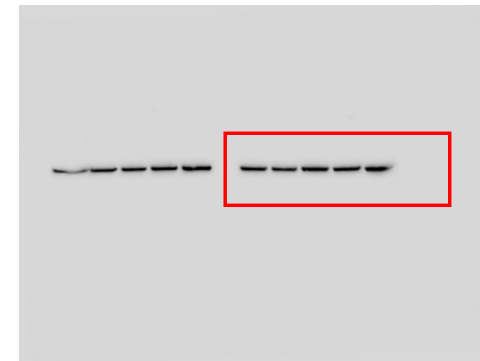

P63

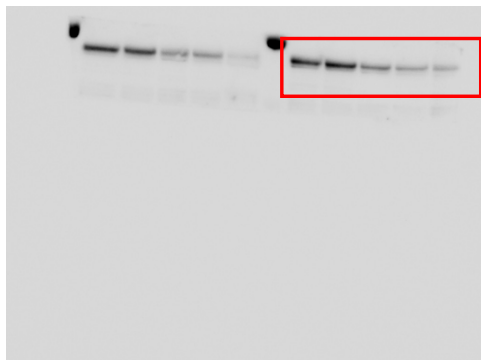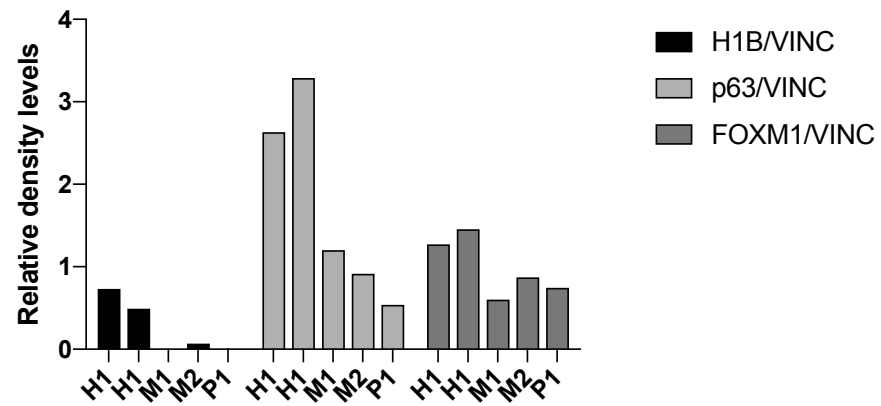

**Figure 2d**

FOXM1

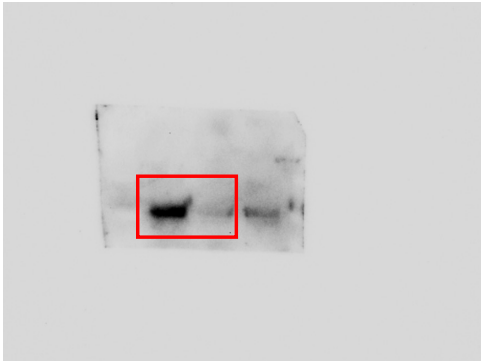

H1B

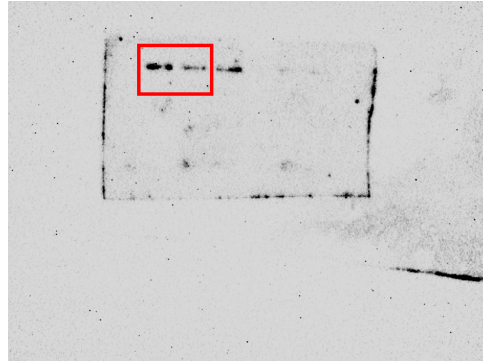

VINC

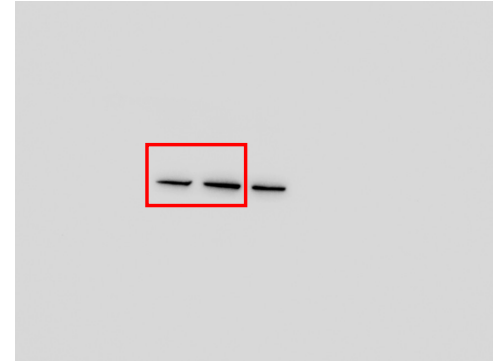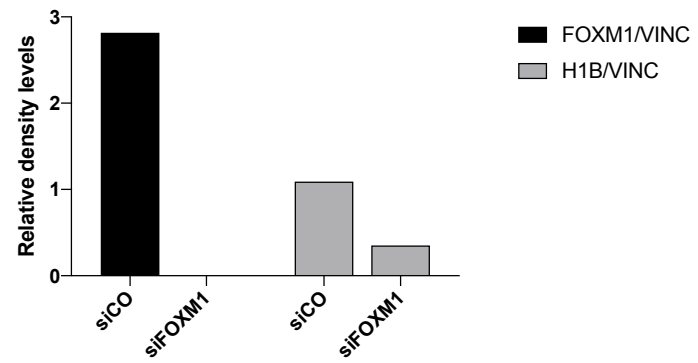

**Figure 3c**

FOXM1

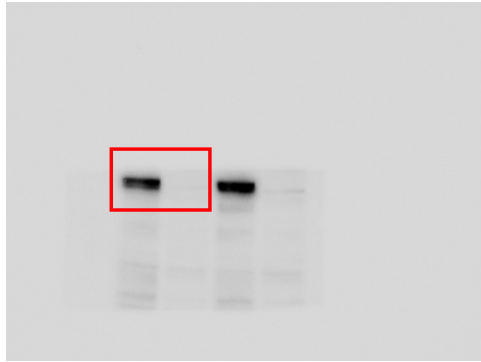

H1B

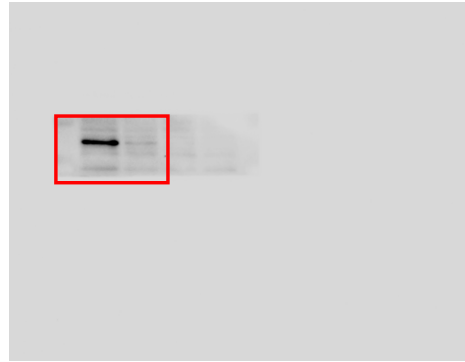

VINC

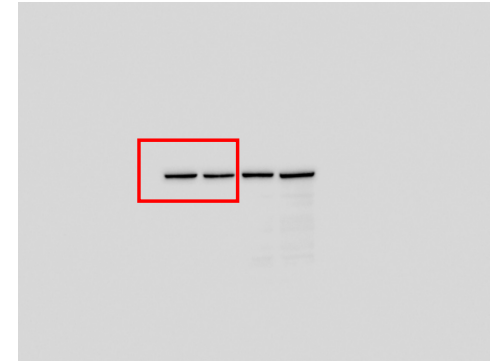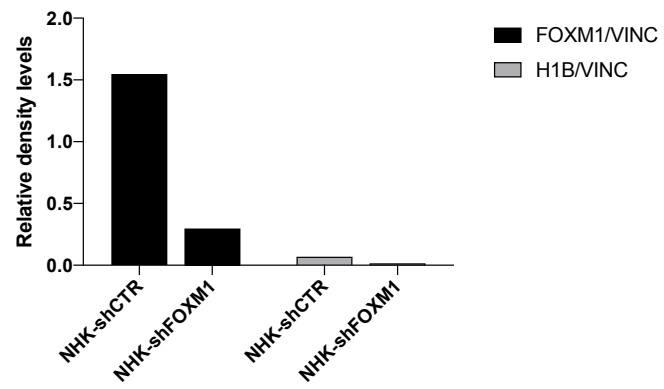

**Figure 3f**

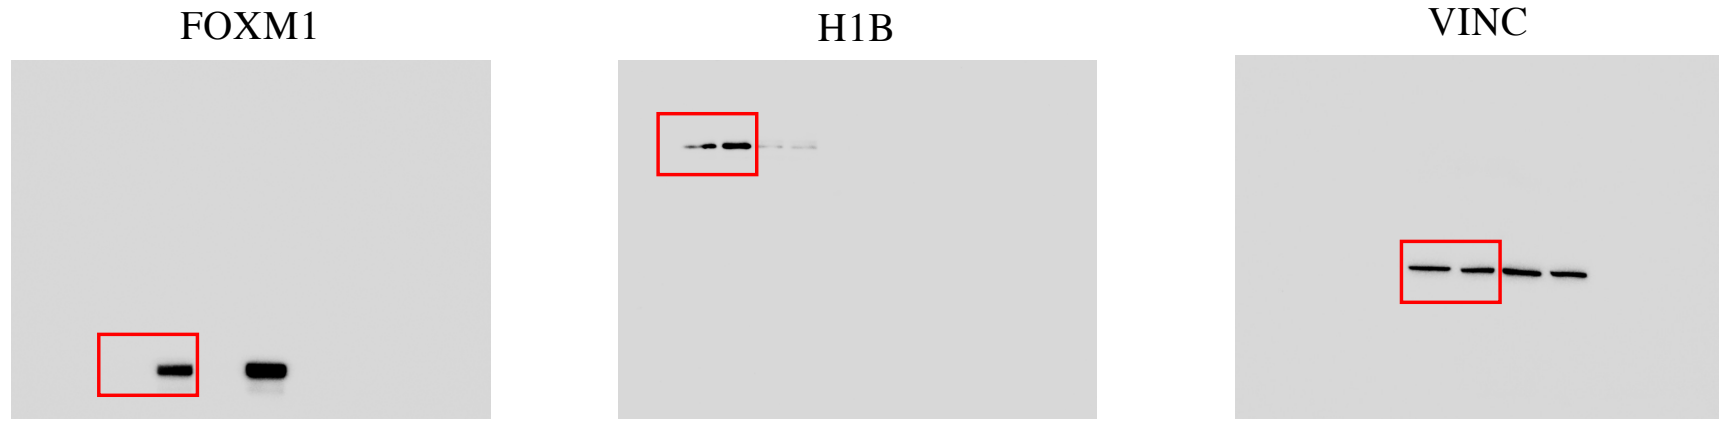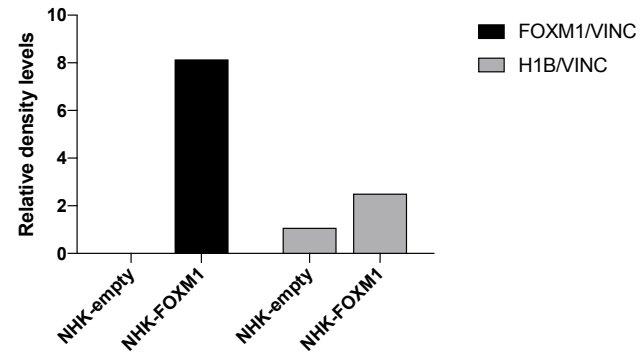

Figure 4c

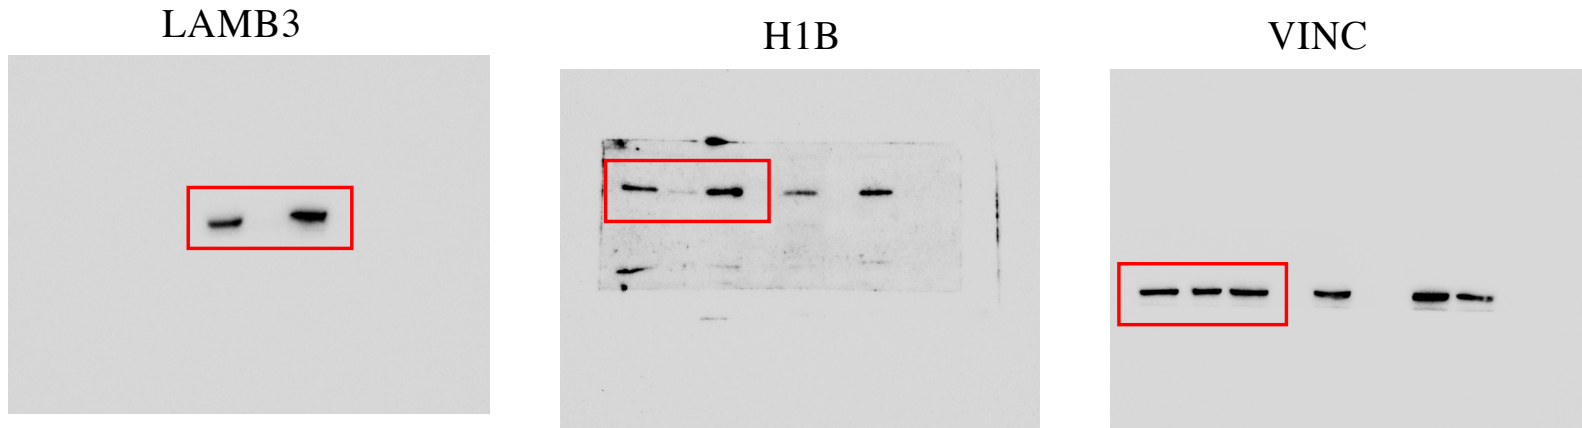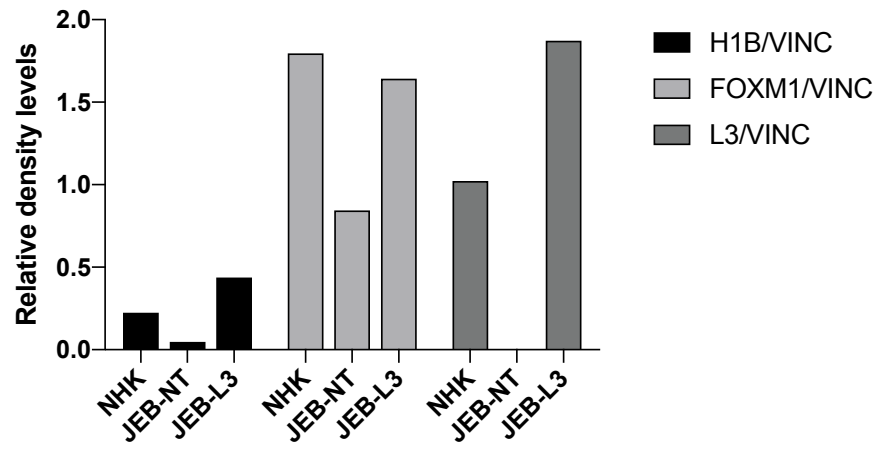

Figure 4d

FOXM1

H1B

VINC

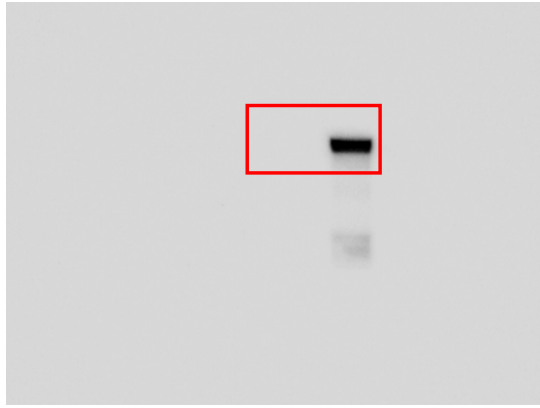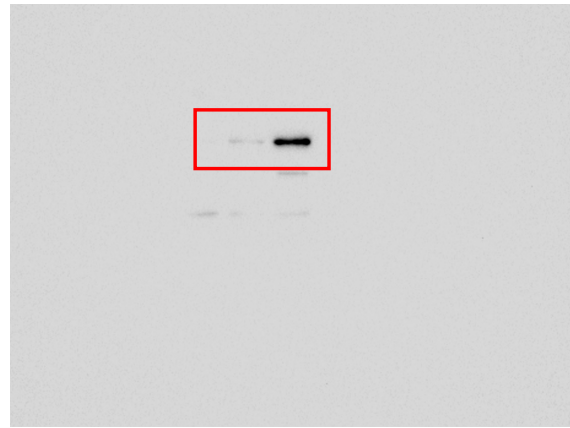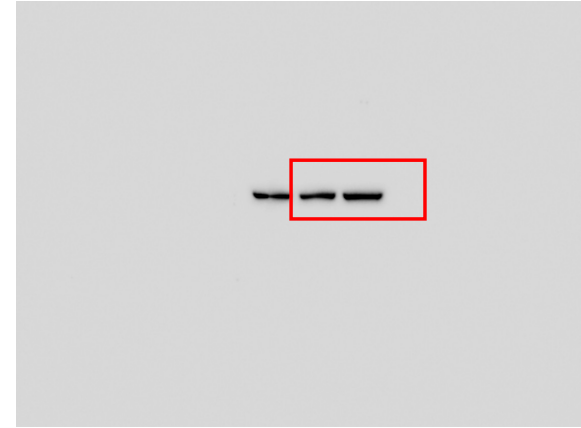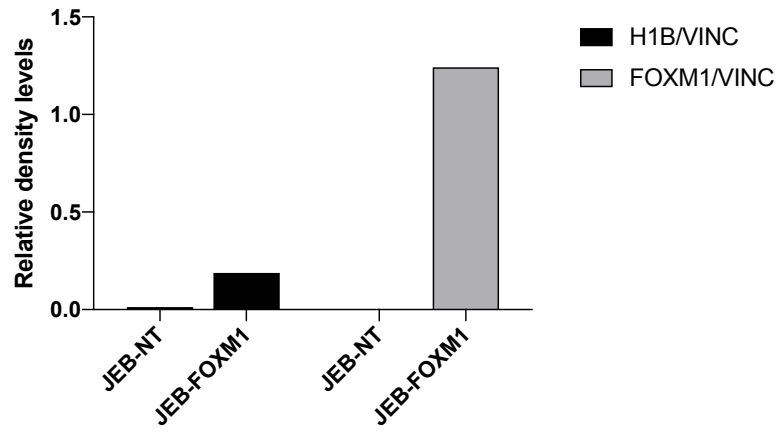

Figure 5b

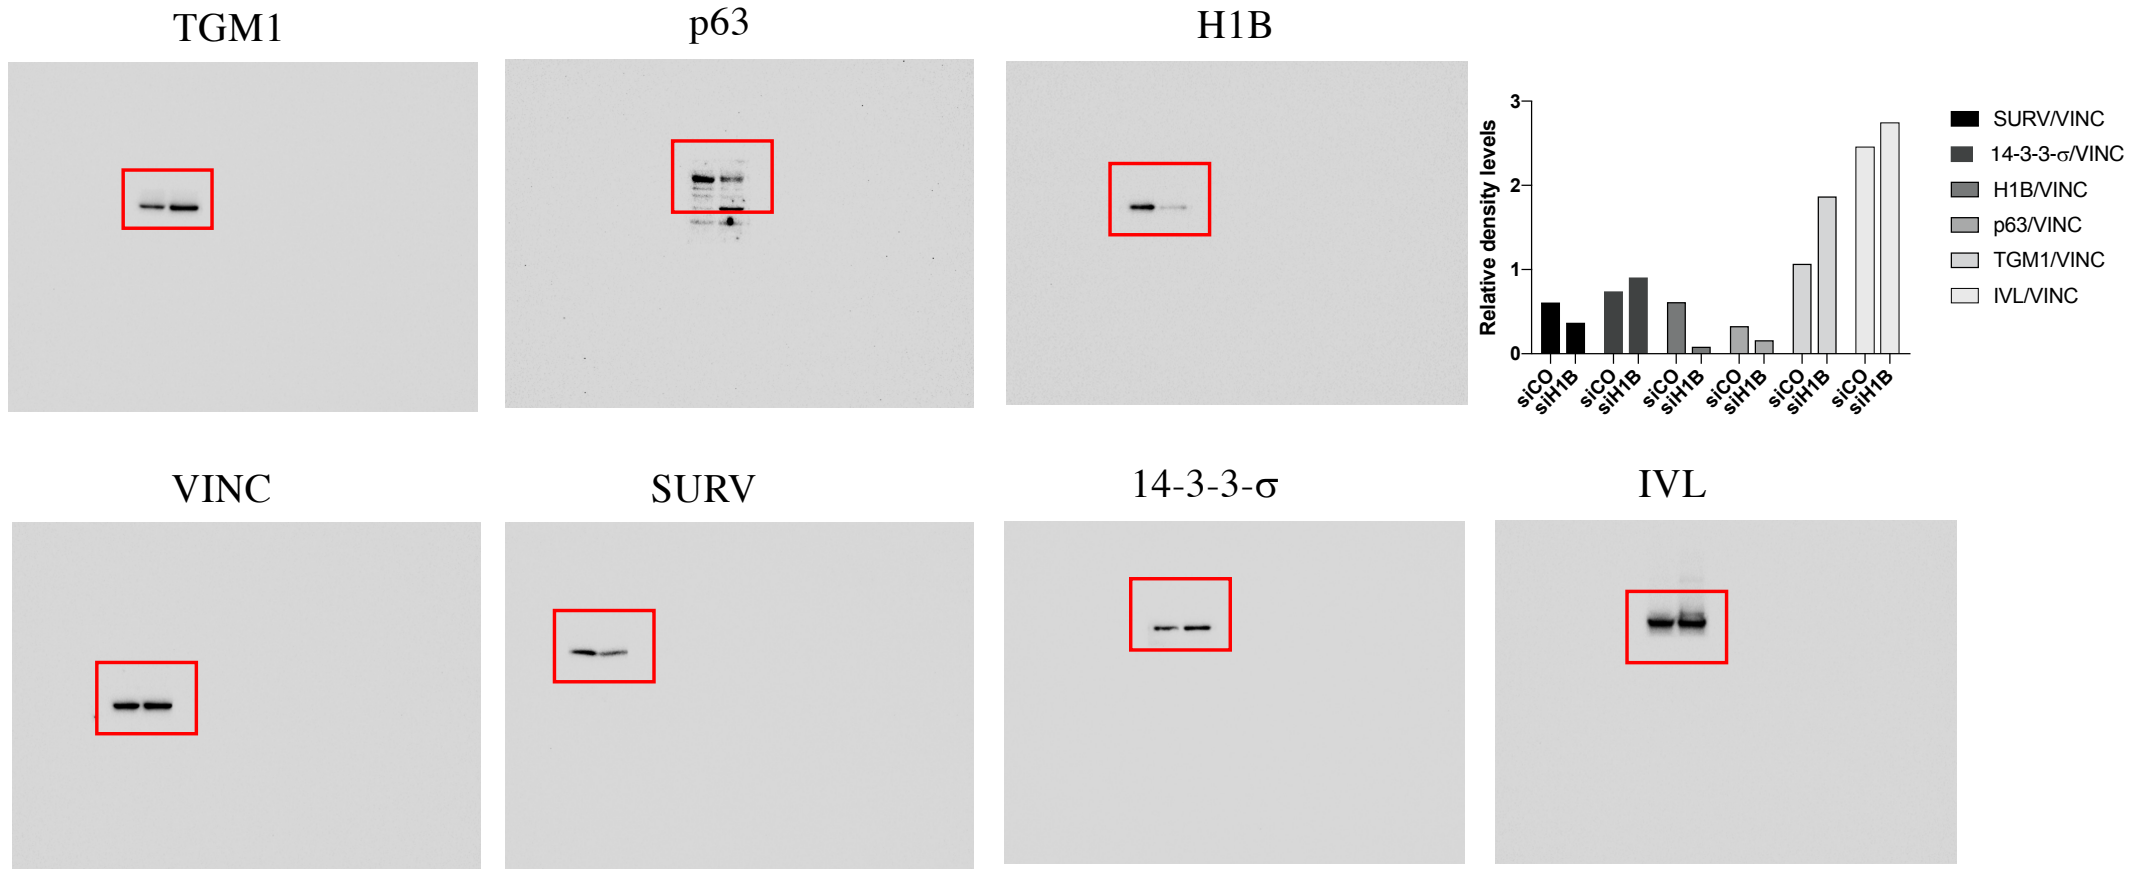

### Supplementary Fig. 1f

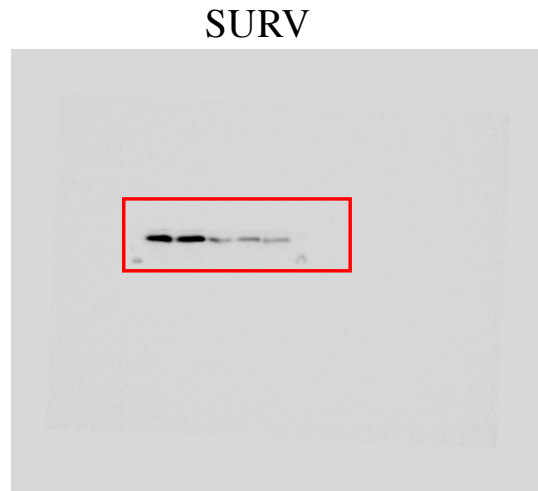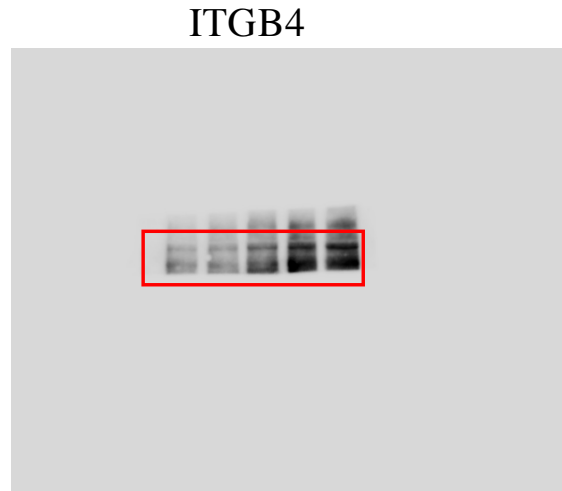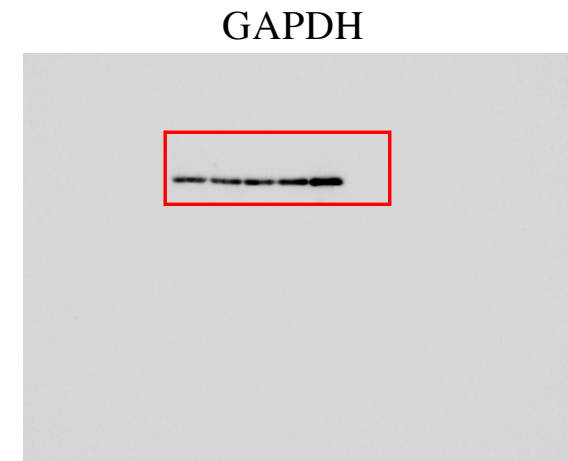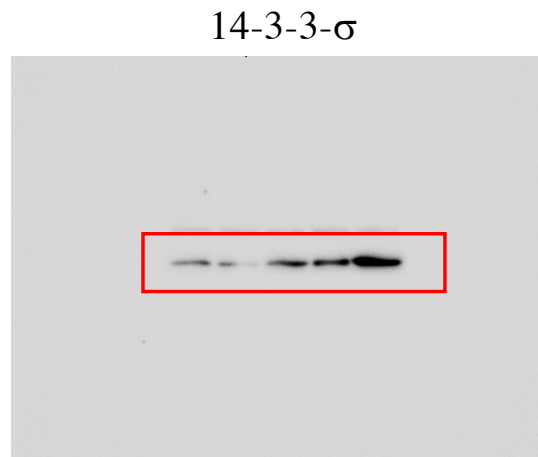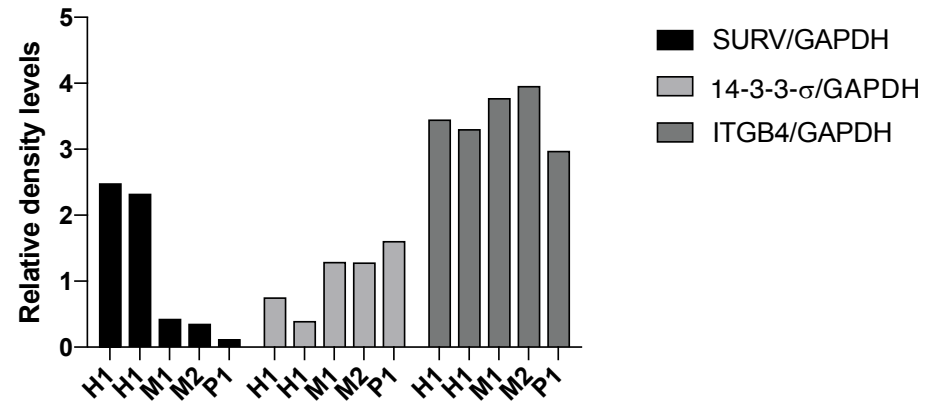

Supplement: 41419_2024_6905_MOESM5_ESM.pdf [file 41419_2024_6905_MOESM5_ESM.pdf]
